# Supplementary material for: Visfatin Increases VEGF-Dependent Angiogenesis of Endothelial Progenitor Cells during Osteoarthritis Progression
Source: MDPI journal article supplement (doi:10.3390/cells9051315), 2020-05-25
Supplement: s1 [file s1]

## Supplementary Data

### (A) EPC migration

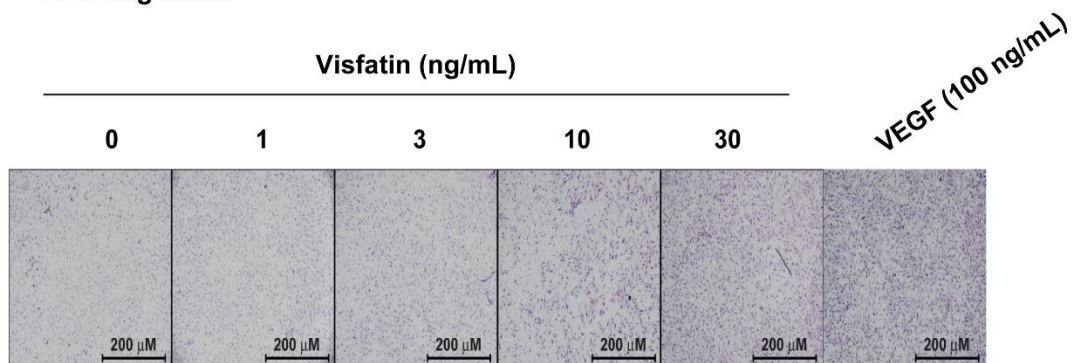

### (B) EPC tubeformation

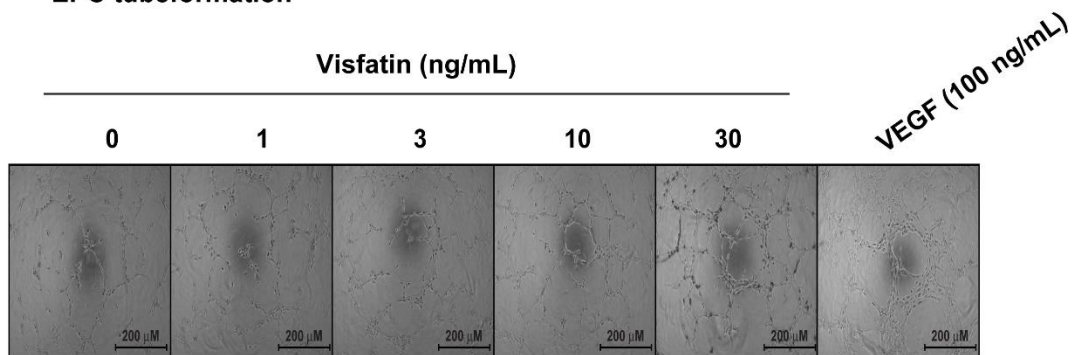

Fig. S1. The image of figure 2D and 2E.

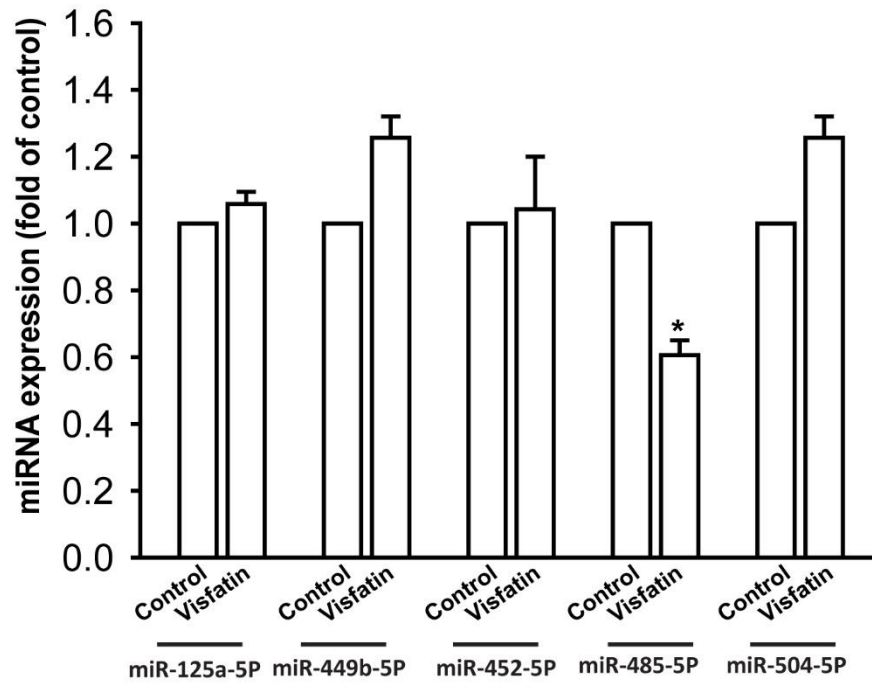

**Fig. S2. The miRNAs expression after Visfatin treatment in human OASFs.** The OASFs were incubated with visfatin (10 ng/mL) for 24 h, and miRNAs expression were examined by qPCR. Results are expressed as the mean  $\pm$  S.D. \*,  $p < 0.05$  compared with control.

**TABLE 1. VISFATIN LEVELS IN SERUM (MANN-WHITNEY TEST)**

| SAMPLE  | Health control | Osteoarthritis |
|---------|----------------|----------------|
| N       | 30             | 30             |
| MINIMUM | 0.1159         | 0.9187         |
| MEDIAN  | 0.6802         | 3.302          |
| MAXIMUM | 4.815          | 9.257          |
| IQR     | 1.8216         | 2.681          |
| P VALUE | 0.0001         | 0.0155         |

**TABLE 2. VEGF LEVELS IN SERUM (MANN-WHITNEY TEST)**

| SAMPLE  | Health control | Osteoarthritis |
|---------|----------------|----------------|
| N       | 30             | 30             |
| MINIMUM | 5.848          | 5.848          |
| MEDIAN  | 36.74          | 176            |
| MAXIMUM | 68.2           | 641.4          |
| IQR     | 40.25          | 166.7          |
| P VALUE | 0.3842         | 0.0357         |
